# Supplementary material for: Supercritical CO2 Extraction of Bioactive Compounds from Mango (Mangifera indica L.) Peel and Pulp
Source: MDPI journal article supplement (doi:10.3390/foods10092201), 2021-09-17
Supplement: s1 [file s1]

# Supercritical CO<sub>2</sub> extraction of bioactive compounds from mango (*Mangifera indica* L.) peel and pulp

José Villacís-Chiriboga<sup>1,2,3</sup>, Stefan Voorspoels<sup>1</sup>, Maarten Uyttebroek<sup>1</sup>, Jenny Ruales<sup>3</sup>, John Van Camp<sup>2</sup>, Edwin Vera<sup>3</sup>, Kathy Elst<sup>1\*</sup>

## Supplementary material

### Supplementary material SS.1

Cumulative SC-CO<sub>2</sub> extraction kinetics of carotenoids from mango at 55 °C and 35 MPa with ethanol and acetone as co-solvents

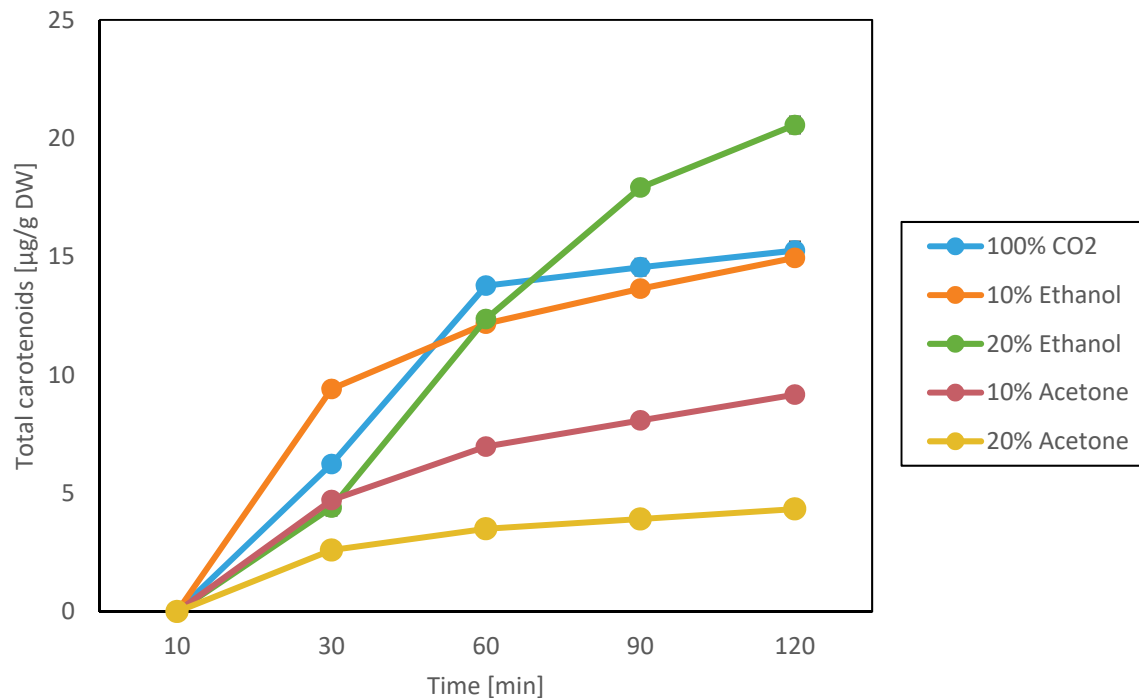

## Supplementary material SS.2

Extraction yield obtained under the different experimental combinations performed for the optimization process.

|                             | 35 MPa                     | 10 MPa                      |
|-----------------------------|----------------------------|-----------------------------|
| 35 °C; 100% CO <sub>2</sub> | 12.81 ± 0.22 <sup>ef</sup> | 0.59 ± 0.04 <sup>e</sup>    |
| 35 °C; 10% EtOH             | 10.10 ± 0.30 <sup>d</sup>  | 0.36 ± 0.02 <sup>abcd</sup> |
| 35 °C; 20% EtOH             | 16.66 ± 0.40 <sup>i</sup>  | 3.17 ± 0.00 <sup>g</sup>    |
| 35 °C; 10% Acet             | 12.52 ± 0.31 <sup>e</sup>  | 0.47 ± 0.00 <sup>de</sup>   |
| 35 °C; 20% Acet             | 13.22 ± 0.30 <sup>fg</sup> | 0.21 ± 0.00 <sup>a</sup>    |
| 55 °C; 100% CO <sub>2</sub> | 15.26 ± 0.41 <sup>h</sup>  | 0.21 ± 0.00 <sup>a</sup>    |
| 55 °C; 10% EtOH             | 14.95 ± 0.10 <sup>h</sup>  | 2.00 ± 0.02 <sup>f</sup>    |
| 55 °C; 20% EtOH             | 20.56 ± 0.39 <sup>i</sup>  | 4.70 ± 0.35 <sup>h</sup>    |
| 55 °C; 10% Acet             | 9.17 ± 0.02 <sup>c</sup>   | 0.35 ± 0.04 <sup>abcd</sup> |
| 55 °C; 20% Acet             | 4.33 ± 0.01 <sup>a</sup>   | 0.45 ± 0.03 <sup>cde</sup>  |
| 70 °C; 100% CO <sub>2</sub> | 9.65 ± 0.21 <sup>cd</sup>  | 0.25 ± 0.01 <sup>ab</sup>   |
| 70 °C; 10% EtOH             | 13.85 ± 1.22 <sup>g</sup>  | 0.30 ± 0.00 <sup>abc</sup>  |
| 70 °C; 20% EtOH             | 16.94 ± 0.10 <sup>b</sup>  | 0.44 ± 0.00 <sup>cde</sup>  |
| 70 °C; 10% Acet             | 12.31 ± 0.06 <sup>e</sup>  | 0.46 ± 0.00 <sup>de</sup>   |
| 70 °C; 20% Acet             | 8.39 ± 0.39 <sup>i</sup>   | 0.40 ± 0.02 <sup>bcd</sup>  |

Values are mean ± relative difference ( $n = 2$ ).

Means with different letters in the same row indicate statistically significant differences between the carotenoids content and the extraction variables

### Supplementary material SS.3

Statistical analysis of the models applied for the optimized extraction of carotenoids from mango with SC-CO<sub>2</sub> modified with EtOH or acetone

Extraction performed with ethanol

| <i>Source</i>         | <i>Sum of squares</i> | <i>DF</i> | <i>Medium square</i> | <i>F-ratio</i> | <i>p-value</i> |
|-----------------------|-----------------------|-----------|----------------------|----------------|----------------|
| 1: Temperature [°C]   | 0,849                 | 1         | 0,849                | 0,41           | 0,525          |
| 2: Pressure [MPa]     | 1567,16               | 1         | 1567,16              | 763,35         | 0              |
| 3: Ethanol [%]        | 93,531                | 1         | 93,531               | 45,56          | 0              |
| Temperature square    | 51,563                | 1         | 51,563               | 25,12          | 0              |
| Pressure × co-solvent | 14,087                | 1         | 14,087               | 6,86           | 0,014          |
| Co-solvent square     | 18,275                | 1         | 18,275               | 8,9            | 0,006          |
| Blocks                | 0,032                 | 1         | 0,032                | 0,02           | 0,901          |
| Total error           | 57,484                | 28        | 2,053                |                |                |
| Total (corr.)         | 1802,24               | 35        |                      |                |                |

$R^2 = 96,81$

$R^2 \text{ adj} = 96,013$

Extraction performed with acetone

| <i>Source</i>          | <i>Sum of squares</i> | <i>DF</i> | <i>Medium square</i> | <i>F-ratio</i> | <i>p-value</i> |
|------------------------|-----------------------|-----------|----------------------|----------------|----------------|
| 1: Temperature [°C]    | 13,161                | 1         | 13,161               | 3,70           | 0,064          |
| 2: Pressure [MPa]      | 996,88                | 1         | 996,88               | 280,22         | 0,000          |
| 3: Acetone [%]         | 23,027                | 1         | 23,027               | 6,47           | 0,017          |
| Temperature × Pressure | 12,166                | 1         | 12,166               | 3,42           | 0,075          |
| Pressure × Co-solvent  | 23,111                | 1         | 23,111               | 6,50           | 0,016          |
| Blocks                 | 0,002                 | 1         | 0,002                | 0,00           | 0,983          |
| Total error            | 103,167               | 29        | 3,557                |                |                |
| Total (corr.)          | 1162,1                | 35        |                      |                |                |

$R^2 = 91,122$

$R^2 \text{ adj} = 89,286$

## Supplementary material SS.4

Chromatograms obtained on the analysis for carotenoids and phenolics.

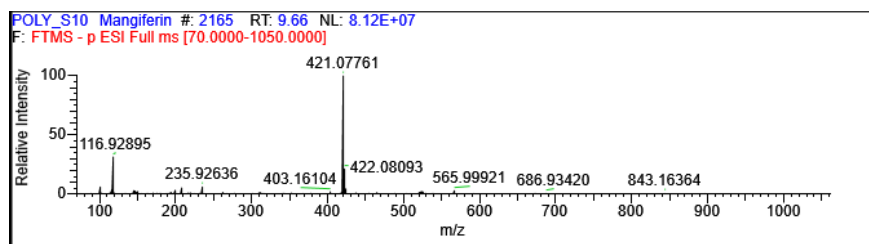

Fig 1. Phenolic compounds analysis via UPLC

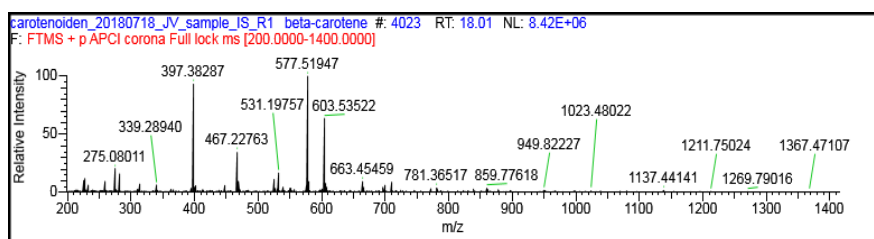

Fig 2. Carotenoid analysis via UPLC
